# Supplementary material for: A solution to the long-standing problem of actin expression and purification
Source: PubMed Central journal article supplement — Proc Natl Acad Sci U S A. 2022 Oct 5;119(41):e2209150119. doi: 10.1073/pnas.2209150119 (PMC9565351; doi:10.1073/pnas.2209150119), 2022-10-05
Supplement: pnas.2209150119.sapp.pdf [file pnas.2209150119.sapp.pdf]

## Supplementary Information for

### A solution to the long-standing problem of actin expression and purification

Rachel H. Ceron, Peter J. Carman, Grzegorz Rebowksi, Malgorzata Boczkowska, Robert O. Heuckeroth, Roberto Dominguez

Correspondence: Roberto Dominguez  
Email: droberto@pennmedicine.upenn.edu

#### This PDF file includes:

|             |                                                                                             |
|-------------|---------------------------------------------------------------------------------------------|
| Fig. S1     | Prediction of high-specificity chymotrypsin cleavage sites in skeletal $\alpha$ -actin      |
| Fig. S2     | Western blot analysis of Nt-acetylation of tissue-purified and recombinant $\alpha$ -actin  |
| Fig. S3     | (Two parts) Annotated MS2 spectra of post-translationally modified $\beta$ -actin peptides  |
| Fig. S4     | (Two parts) Annotated MS2 spectra of post-translationally modified $\alpha$ -actin peptides |
| Fig. S5     | Actin sequence alignment and MS2 spectrum of $\gamma$ -actin N-terminal peptide             |
| Table S1    | Published actin expression methods and their limitations                                    |
| Table S2    | Primers used in this study                                                                  |
| Table S3    | Antibodies used in this study                                                               |
| Legend for  | Datasets S1 and S2                                                                          |
| SI Appendix | references                                                                                  |

#### Other supplementary materials for this manuscript include the following:

|            |                                                                                           |
|------------|-------------------------------------------------------------------------------------------|
| Dataset S1 | Complete list of MS peptides observed for endogenous and recombinant $\beta$ -actin       |
| Dataset S2 | Complete list of MS peptides observed for tissue-purified and recombinant $\alpha$ -actin |



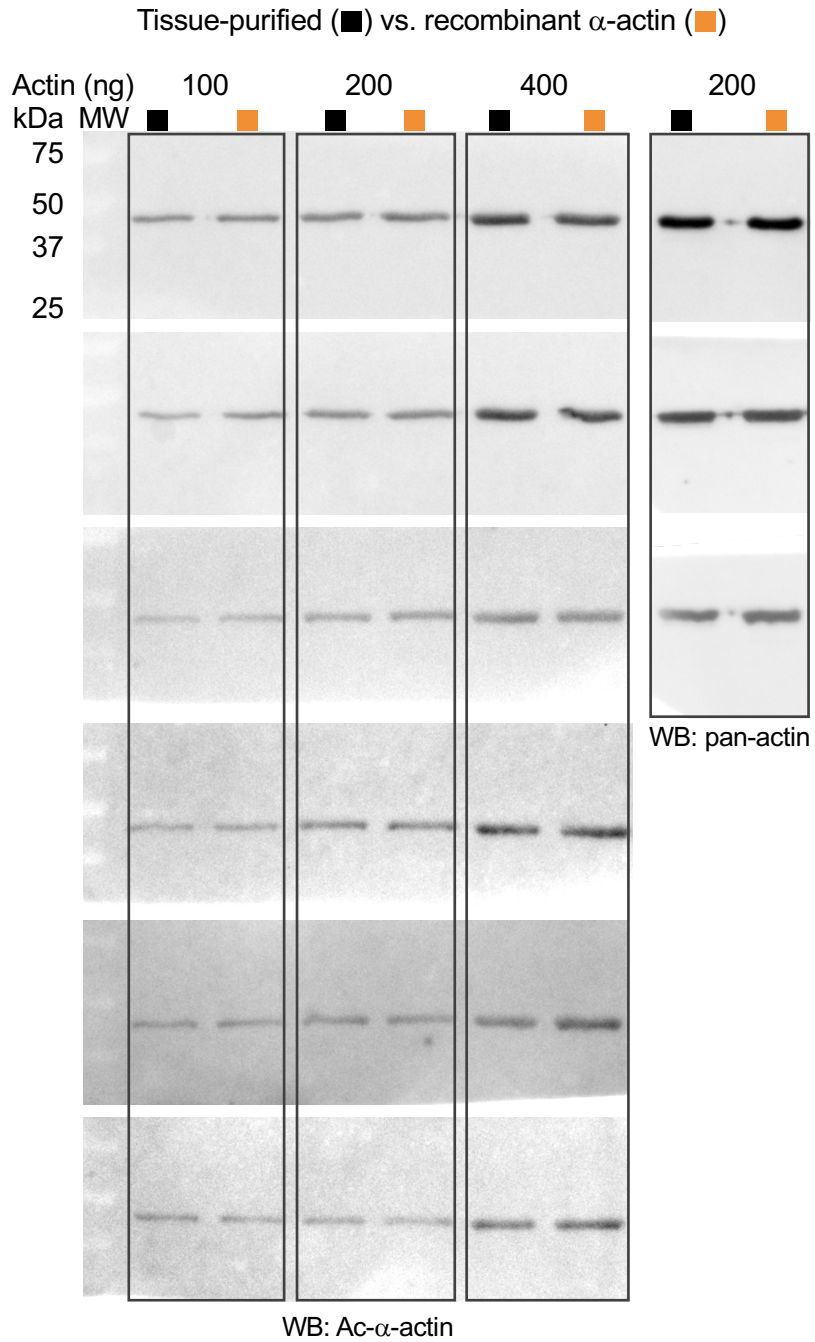

**Fig. S2.** Western blots of tissue-purified (endogenous) and recombinant  $\alpha$ -actin. Left, Western blots using  $\alpha$ -actin Nt-acetylation specific antibody. Right, Western blots using pan-actin antibody.

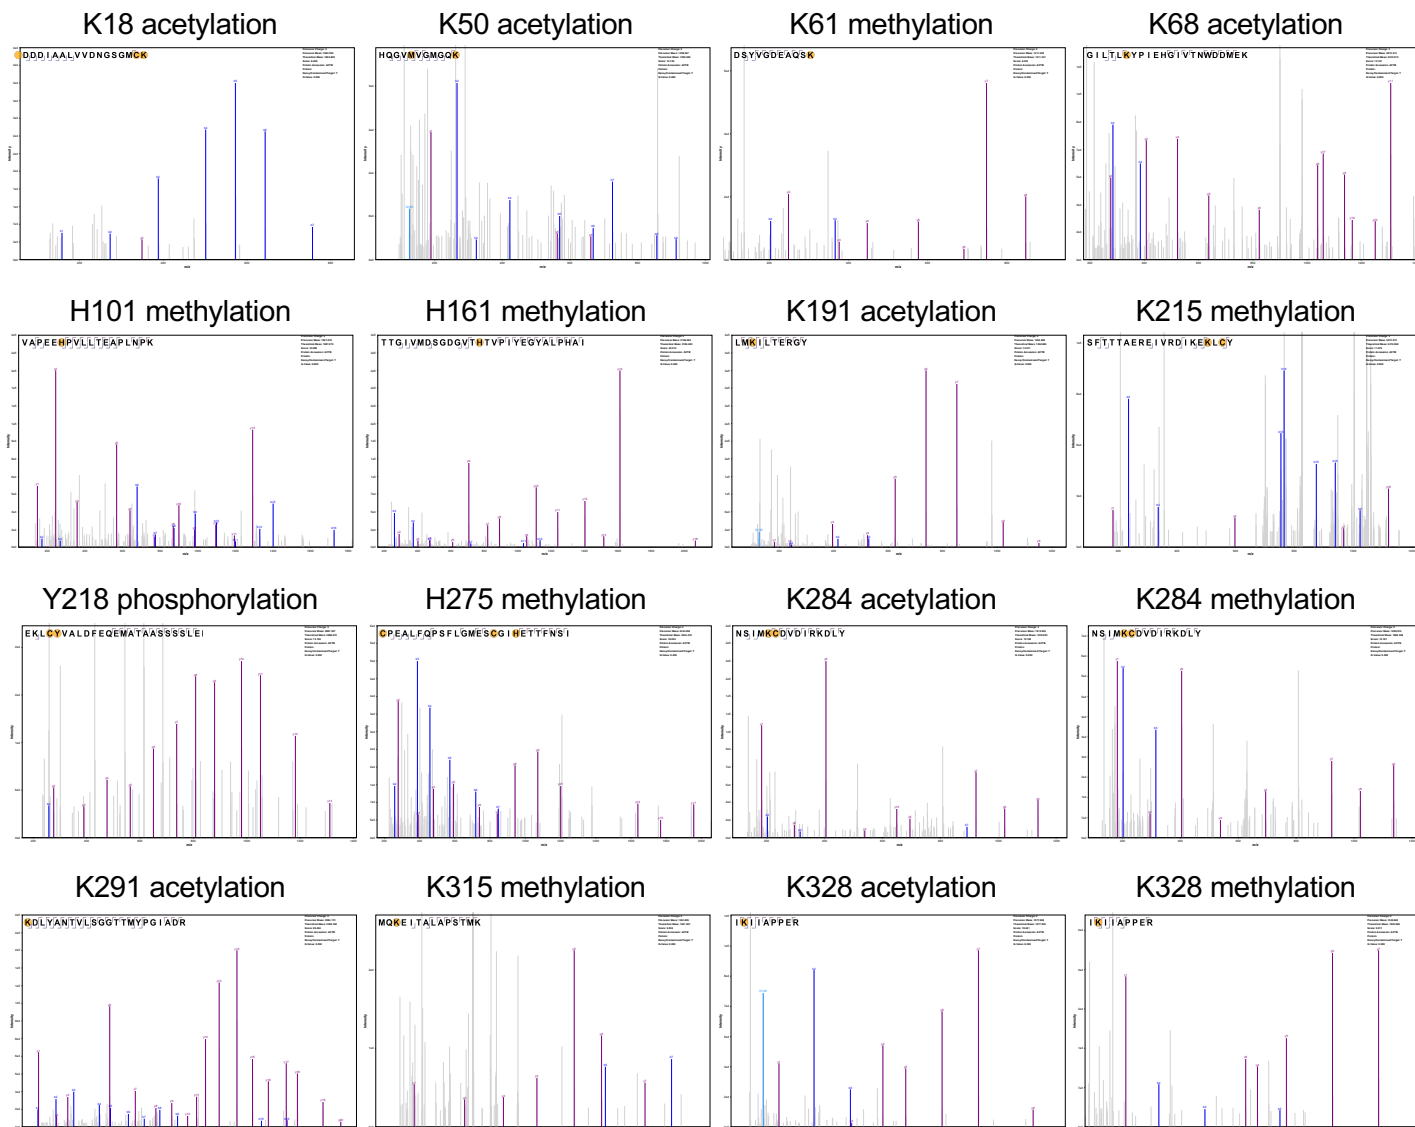

**Fig. S3 (part 1 of 2).** Annotated MS2 spectra of PTM peptides of endogenous  $\beta$ -actin with an FDR <1%. Modifications occurring during sample preparation for proteomics analysis, such as carbamylation and carbamidomethylation, are shown but not named. The title of each MS2 spectrum refers to common PTMs occurring in cells, such as phosphorylation, methylation and acetylation. See also Fig. 4B for MS2 spectra of Nt-acetylated and H73-methylated peptides.

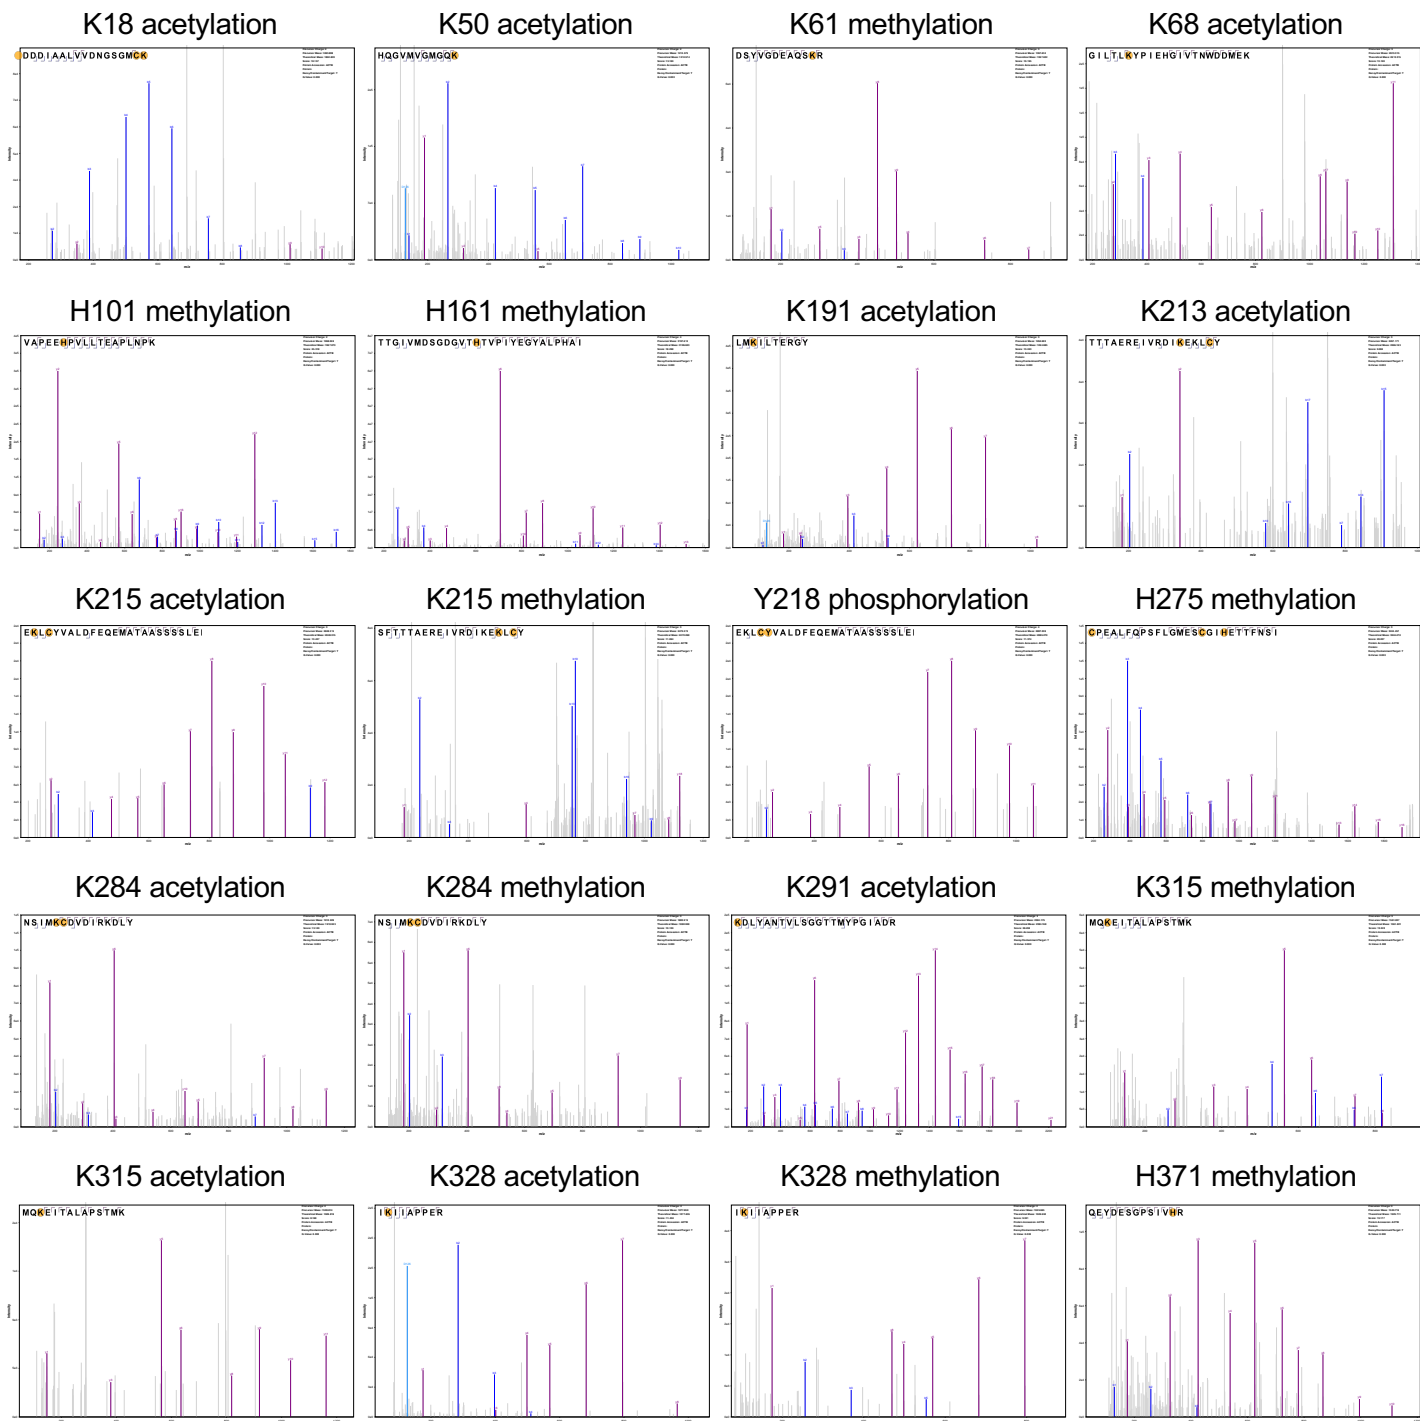

**Fig. S3 (part 2 of 2).** Annotated MS2 spectra of PTM peptides of recombinant  $\beta$ -actin.

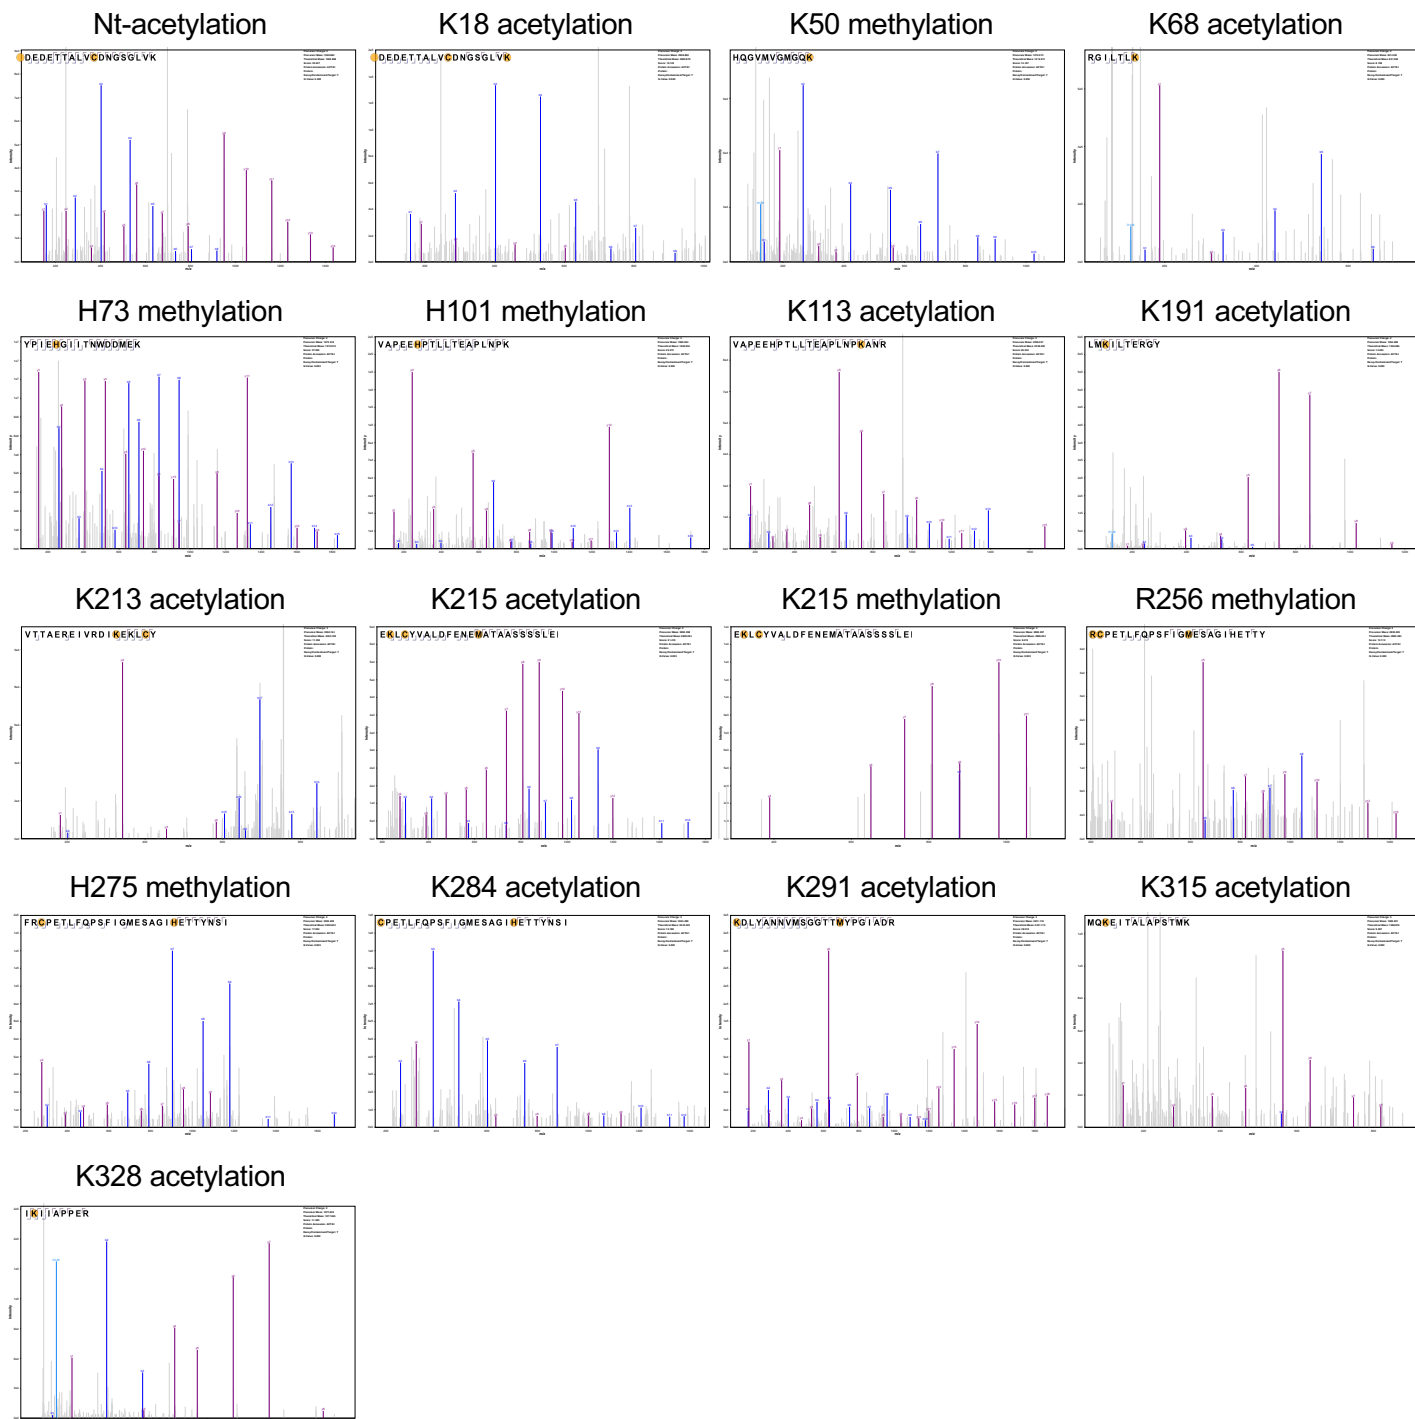

**Fig. S4 (part 1 of 2).** Annotated MS2 spectra of PTM peptides of tissue-purified  $\alpha$ -actin with an FDR <1%. Modifications occurring during sample preparation for proteomics analysis, such as carbamylation and carbamidomethylation, are shown but not named. The title of each MS2 spectrum refers to common PTMs occurring in cells, such as phosphorylation, methylation and acetylation.

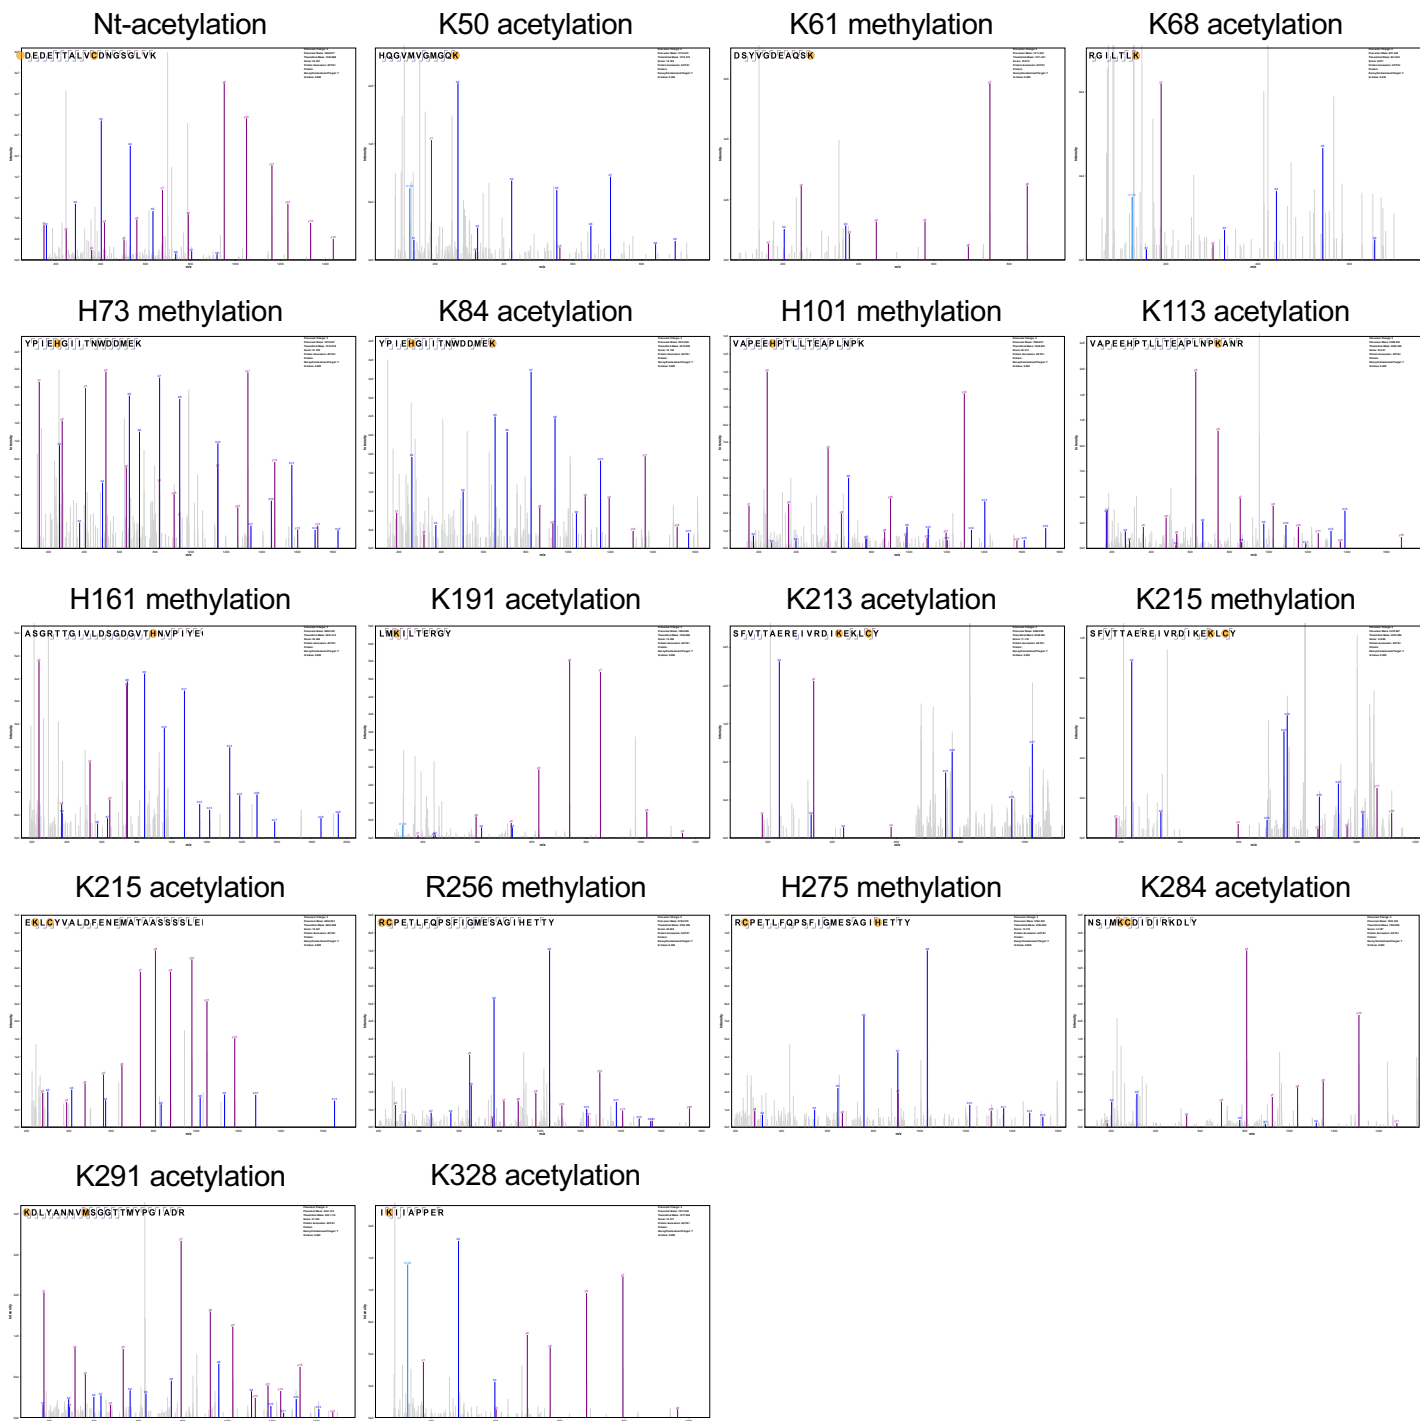

Fig. S4 (part 2 of 2). Annotated MS2 spectra of PTM peptides of recombinant  $\alpha$ -actin.

|                 |                                                                                               |     |
|-----------------|-----------------------------------------------------------------------------------------------|-----|
| $\beta$ -actin  | Ac-DDD I A A L V V D N G S G M C K A G F A G D D A P R A V F P S I V G R P R H Q G V M V G M  | 47  |
| $\gamma$ -actin | Ac-EEE I A A L V I D N G S G M C K A G F A G D D A P R A V F P S I V G R P R H Q G V M V G M  | 47  |
| $\beta$ -actin  | G Q K D S Y V G D E A Q S K R G I L T L K Y P I E H G I V T N W D D M E K I W H H T F Y N E L | 94  |
| $\gamma$ -actin | G Q K D S Y V G D E A Q S K R G I L T L K Y P I E H G I V T N W D D M E K I W H H T F Y N E L | 94  |
| $\beta$ -actin  | R V A P E E H P V L L T E A P L N P K A N R E K M T Q I M F E T F N T P A M Y V A I Q A V L S | 141 |
| $\gamma$ -actin | R V A P E E H P V L L T E A P L N P K A N R E K M T Q I M F E T F N T P A M Y V A I Q A V L S | 141 |
| $\beta$ -actin  | L Y A S G R T T G I V M D S G D G V T H T V P I Y E G Y A L P H A I L R L D L A G R D L T D Y | 188 |
| $\gamma$ -actin | L Y A S G R T T G I V M D S G D G V T H T V P I Y E G Y A L P H A I L R L D L A G R D L T D Y | 188 |
| $\beta$ -actin  | L M K I L T E R G Y S F T T T A E R E I V R D I K E K L C Y V A L D F E Q E M A T A A S S S S | 235 |
| $\gamma$ -actin | L M K I L T E R G Y S F T T T A E R E I V R D I K E K L C Y V A L D F E Q E M A T A A S S S S | 235 |
| $\beta$ -actin  | L E K S Y E L P D G Q V I T I G N E R F R C P E A L F Q P S F L G M E S C G I H E T T F N S I | 282 |
| $\gamma$ -actin | L E K S Y E L P D G Q V I T I G N E R F R C P E A L F Q P S F L G M E S C G I H E T T F N S I | 282 |
| $\beta$ -actin  | M K C D V D I R K D L Y A N T V L S G G T T M Y P G I A D R M Q K E I T A L A P S T M K I K I | 329 |
| $\gamma$ -actin | M K C D V D I R K D L Y A N T V L S G G T T M Y P G I A D R M Q K E I T A L A P S T M K I K I | 329 |
| $\beta$ -actin  | I A P P E R K Y S V W I G G S I L A S L S T F Q Q M W I S K Q E Y D E S G P S I V H R K C F   | 375 |
| $\gamma$ -actin | I A P P E R K Y S V W I G G S I L A S L S T F Q Q M W I S K Q E Y D E S G P S I V H R K C F   | 375 |

Nt-acetylated peptide (amino acids 2-18) of endogenous  $\gamma$ -actin purified from untransfected Expi293F cells

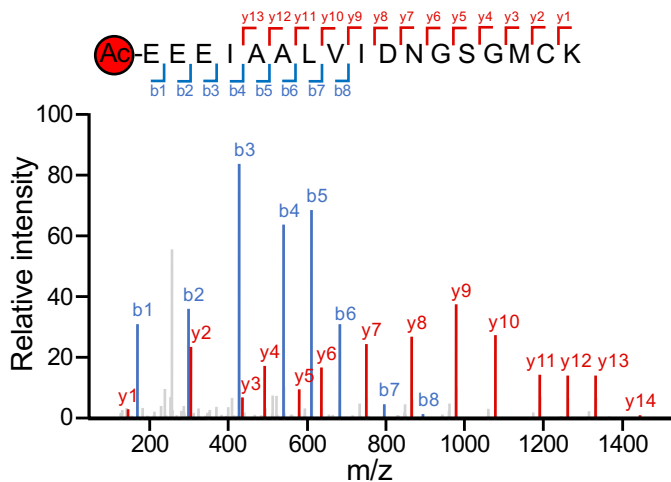

**Fig. S5.** Sequence alignment of cytoplasmic  $\beta$ - and  $\gamma$ -actin (top). A dashed green box highlights the Nt-acetylated N-terminal peptide (amino acids 2-18) of endogenous  $\gamma$ -actin whose MS2 spectrum is shown at the bottom. Note that endogenous  $\beta$ - and  $\gamma$ -actin co-purify from untransfected Expi293F cells.



**Table S1.** Published actin expression methods and their limitations.

| Expression system    | Reference | Limitations                      |                                      |                                                   |                         |                                                     |            |
|----------------------|-----------|----------------------------------|--------------------------------------|---------------------------------------------------|-------------------------|-----------------------------------------------------|------------|
|                      |           | Folding concerns or insolubility | Missing demonstration of native PTMs | Missing demonstration of endogenous actin removal | Issues with tag removal | Missing demonstration of native-like polymerization | Low yields |
| <i>E. coli</i>       | (1)       | x                                | x                                    |                                                   |                         | x                                                   | x          |
|                      | (2)       | x                                | x                                    |                                                   |                         | x                                                   | x          |
|                      | (3)       |                                  | x                                    |                                                   | x                       | x                                                   | x          |
| <i>S. cerevisiae</i> | (4, 5)    |                                  | x                                    | Unreliable                                        |                         | x                                                   | x          |
|                      | (6, 7)    |                                  | x                                    |                                                   |                         | x                                                   | x          |
| <i>P. pastoris</i>   | (8, 9)    |                                  |                                      | x                                                 | x                       |                                                     | x          |
| Insect cells         | (10)      |                                  | x                                    | x                                                 |                         | x                                                   |            |
|                      | (11)      |                                  | x                                    | x                                                 |                         | x                                                   |            |
|                      | (12)      |                                  | x                                    | x                                                 | x                       | x                                                   | x          |
|                      | (13)      | x                                | x                                    | x                                                 |                         | x                                                   | x          |
|                      | (14)      |                                  | x                                    | x                                                 | x                       | x                                                   | x          |
|                      | (15)      |                                  | x                                    | x                                                 |                         |                                                     |            |
|                      | (16)      |                                  | x                                    | x                                                 | x                       | x                                                   | x          |
|                      | (17)      |                                  | x                                    | x                                                 | x                       | x                                                   |            |
| <i>D. discoideum</i> | (18)      |                                  | Missing evidence                     | Missing evidence                                  | x                       |                                                     |            |
| Synthetic            | (19)      |                                  | x                                    |                                                   |                         | x                                                   | x          |
|                      | (20)      |                                  | x                                    |                                                   |                         | x                                                   | x          |
| Expi293F             | (21)      |                                  |                                      |                                                   | x                       |                                                     | x          |

**Table S2.** Primers used in this study

| Primer name                | Primer sequence                                              | Purpose                              |
|----------------------------|--------------------------------------------------------------|--------------------------------------|
| ACTA1_HisFLAGtev_for1      | acgatgacaagactagtgagaacctgtattccaggacgaagacgagaccaccgocctc   | Cloning His-FLAG-TEV $\alpha$ -actin |
| ACTA1_HisFLAGtev_for2      | atcaccacagtgaggattacaaggatgacgatgacaagactagtgagaacctgtatttc  | Cloning His-FLAG-TEV $\alpha$ -actin |
| ACTA1_HisFLAGtev_for3_Sal1 | ttcgtcgacgccaccatggcgcatcaccatcatcaccacagtgaggattacaaggatgac | Cloning His-FLAG-TEV $\alpha$ -actin |
| ACTA1_stop_rev_BamH1       | ttcggatccctagaagcatttgcggtggacgatg                           | Cloning His-FLAG-TEV $\alpha$ -actin |
| ACTB_TEV_Spe1_for          | ttcactagtgagaacctgtattccaggacgatgatattgctgctctggtgtc         | Cloning His-FLAG-TEV $\beta$ -actin  |
| ACTB_stop_BamH1_rev        | ttcggatccctagaagcacttgcggtgcacaatg                           | Cloning His-FLAG-TEV $\beta$ -actin  |
| ACTG2_for_Spe1TEV          | ttcactagtgagaacctgtattccaggaaaggagaccaccgocgc                | Cloning His-FLAG-TEV $\gamma$ -actin |
| ACTG2_stop_Bcl1_rev        | ttctgatcactagaagcacttctgtggacaatgg                           | Cloning His-FLAG-TEV $\gamma$ -actin |
| hNat78s_Nde1_for           | cttcatatgagcctggctgagttgacct                                 | Cloning His-Naa80 $\Delta$           |
| hNat308_Xho1_rev           | cttctcgagtcagatgtctttccatccagaatatggg                        | Cloning His-Naa80 $\Delta$           |
| Intein_His_Nde1_rev        | cttcatatggtgatgatggtgatgaccagcattctgtacaacaacctgg            | Cloning His-Naa80 $\Delta$           |
| Intein_Nhe1_for            | cttgctagcacaatcctggtgatccg                                   | Cloning His-Naa80 $\Delta$           |
| MBPG4G6_Pst1_for           | ttcctgcagatgaaaatcgaagaaggtaactggaatctgg                     | Cloning His-MBP-G4G6                 |
| MBPG4G6_Hind3_rev          | ttcaagcttcaggcagccagctcagc                                   | Cloning His-MBP-G4G6                 |
| G4s_Xho1                   | ttcctcgaggcccccagcacgg                                       | Cloning His-MBP-G4G6                 |
| G4G6_Sal1_rev              | ttcgtcgactcaggcagccagctcagc                                  | Cloning His-MBP-G4G6                 |

**Table S3.** Antibodies used in this study

| <b>Antibody</b>             | <b>Dilution</b> | <b>Description</b>                                   | <b>Source</b>             | <b>Cat #</b> |
|-----------------------------|-----------------|------------------------------------------------------|---------------------------|--------------|
| <b>Primary antibodies</b>   |                 |                                                      |                           |              |
| Pan-actin                   | 1:5000          | Rabbit monoclonal recombinant anti-actin Ig          | Abcam                     | ab179467     |
| $\alpha$ -Actin             | 1:1000          | Mouse monoclonal anti-alpha skeletal muscle actin Ig | Abcam                     | ab28052      |
| $\beta$ -Actin              | 1:5000          | Mouse monoclonal anti-human actin beta Ig            | Bio-Rad                   | MCA5775GA    |
| Ac- $\alpha$ -actin         | 1:2000          | Biotinylated monoclonal anti-alpha skeletal actin Ig | Novus Biologicals         | NBP1-97723B  |
| Ac- $\beta$ -actin          | 1:5000          | Mouse monoclonal anti-beta actin Ig                  | Abcam                     | ab6276       |
| <b>Secondary antibodies</b> |                 |                                                      |                           |              |
| Anti-rabbit IgG-HRP         | 1:10000         | Anti-rabbit HRP-linked Ig                            | Cell Signaling Technology | 7074S        |
| Anti-mouse IgG-HRP          | 1:10000         | Anti-mouse HRP-linked Ig                             | Cell Signaling Technology | 7076S        |
| Streptavidin-HRP            | 1:5000          | HRP-conjugated streptavidin                          | ThermoFisher Scientific   | N100         |

**Other supplementary materials for this manuscript not included in this file:**

**Dataset S1 (separate Microsoft Excel file).** Complete list of MS peptides observed for recombinant  $\beta$ -actin and endogenous  $\beta/\gamma$ -actin. See below for a description of the dataset.

**Dataset S2 (separate Microsoft Excel file).** Complete list of MS peptides observed for tissue-purified and recombinant  $\alpha$ -actin. See below for a description of the dataset.

For both **Dataset S1** and **S2**:

Rows correspond to actin peptides observed by MS, including the specific actin sample, digestion enzyme, and MS2 scan number. The full sequence displays the base amino acid sequence and the location of all modifications, while the essential sequence omits common fixed and variable modifications that occur as a result of sample preparation for MS analysis. The score, Q value, PEP, and PEP Q value are measures of confidence in the peptide assignment. PSM (peptide spectral match) count reports the number of times a given peptide was observed. More information about peptide assignment statistics can be found at the MetaMorpheus website (<https://github.com/smith-chem-wisc/MetaMorpheus>). Note that for  $\beta$ -actin (Dataset S1) the residue numbers in column X must be increased by one to match the conventional actin numbering. Sheets two and three of each dataset report the PTM occupancy of endogenous and recombinant actin, sorted by amino acid number. For each PTM, the occupancy is defined as the number of peptides (PSM count) containing the PTM divided by the total number of peptides that cover the residue site. The remaining sheets compile all the peptides covering PTM-containing residues.

## SI Appendix references:

1. S. E. Hitchcock-DeGregori, Structure-function analysis of thin filament proteins expressed in *Escherichia coli*. *Cell Motil Cytoskeleton* **14**, 12-20 (1989).
2. S. Frankel, R. Sohn, L. Leinwand, The use of sarkosyl in generating soluble protein after bacterial expression. *Proc Natl Acad Sci U S A* **88**, 1192-1196 (1991).
3. M. Tamura, K. Ito, S. Kunihiro, C. Yamasaki, M. Haragauchi, Production of human beta-actin and a mutant using a bacterial expression system with a cold shock vector. *Protein Expr Purif* **78**, 1-5 (2011).
4. R. Karlsson, Expression of chicken beta-actin in *Saccharomyces cerevisiae*. *Gene* **68**, 249-257 (1988).
5. P. Aspenstrom, R. Karlsson, Interference with myosin subfragment-1 binding by site-directed mutagenesis of actin. *Eur J Biochem* **200**, 35-41 (1991).
6. R. Karlsson, P. Aspenstrom, A. S. Bystrom, A chicken beta-actin gene can complement a disruption of the *Saccharomyces cerevisiae* ACT1 gene. *Mol Cell Biol* **11**, 213-217 (1991).
7. M. McKane *et al.*, A mammalian actin substitution in yeast actin (H372R) causes a suppressible mitochondria/vacuole phenotype. *J Biol Chem* **280**, 36494-36501 (2005).
8. T. Hatano, L. Sivashanmugam, A. Suchenko, H. Hussain, M. K. Balasubramanian, Pick-ya actin - a method to purify actin isoforms with bespoke key post-translational modifications. *J Cell Sci* **133** (2020).
9. T. Hatano *et al.*, Rapid production of pure recombinant actin isoforms in *Pichia pastoris*. *J Cell Sci* **131** (2018).
10. P. Anthony Akkari *et al.*, Production of human skeletal alpha-actin proteins by the baculovirus expression system. *Biochem Biophys Res Commun* **307**, 74-79 (2003).
11. P. B. Joel, P. M. Fagnant, K. M. Trybus, Expression of a nonpolymerizable actin mutant in Sf9 cells. *Biochemistry* **43**, 11554-11559 (2004).
12. L. A. Rutkevich, D. J. Teal, J. F. Dawson, Expression of actin mutants to study their roles in cardiomyopathy. *Can J Physiol Pharmacol* **84**, 111-119 (2006).
13. B. M. Miller, K. M. Trybus, Functional effects of nemaline myopathy mutations on human skeletal alpha-actin. *J Biol Chem* **283**, 19379-19388 (2008).
14. A. H. Iwane, M. Morimatsu, T. Yanagida, Recombinant alpha-actin for specific fluorescent labeling. *Proc Jpn Acad Ser B Phys Biol Sci* **85**, 491-499 (2009).
15. S. E. Bergeron, M. Zhu, S. M. Thiem, K. H. Friderici, P. A. Rubenstein, Ion-dependent polymerization differences between mammalian beta- and gamma-nonmuscle actin isoforms. *J Biol Chem* **285**, 16087-16095 (2010).
16. B. Barua, P. M. Fagnant, D. A. Winkelmann, K. M. Trybus, S. E. Hitchcock-DeGregori, A periodic pattern of evolutionarily conserved basic and acidic residues constitutes the binding interface of actin-tropomyosin. *J Biol Chem* **288**, 9602-9609 (2013).
17. H. Lu, P. M. Fagnant, C. S. Bookwalter, P. Joel, K. M. Trybus, Vascular disease-causing mutation R258C in ACTA2 disrupts actin dynamics and interaction with myosin. *Proc Natl Acad Sci U S A* **112**, E4168-4177 (2015).
18. T. Q. Noguchi, N. Kanzaki, H. Ueno, K. Hirose, T. Q. Uyeda, A novel system for expressing toxic actin mutants in *Dictyostelium* and purification and characterization of a dominant lethal yeast actin mutant. *J Biol Chem* **282**, 27721-27727 (2007).
19. T. L. Solomon, L. R. Solomon, L. S. Gay, P. A. Rubenstein, Studies on the role of actin's aspartic acid 3 and aspartic acid 11 using oligodeoxynucleotide-directed site-specific mutagenesis. *J Biol Chem* **263**, 19662-19669 (1988).
20. C. F. Costa *et al.*, Myopathy mutations in alpha-skeletal-muscle actin cause a range of molecular defects. *J Cell Sci* **117**, 3367-3377 (2004).
21. M. A *et al.*, Regulation of INF2-mediated actin polymerization through site-specific lysine acetylation of actin itself. *Proc Natl Acad Sci U S A* **117**, 439-447 (2020).
